# Supplementary material for: Ferromagnetic and half-metallic phase transition by doping in a one-dimensional narrow-bandgap W6PCl17 semiconductor
Source: Royal Society of Chemistry journal article supplement (doi:10.1039/d3nr01717f), 2023-01-01
Supplement: d3nr01717f1.pdf [file d3nr01717f1.pdf]

*Electronic Supplementary Information for*

**Ferromagnetic and half-metallic phase transition by doping in one-dimensional narrow-bandgap semiconductor  $W_6PCl_{17}$**

Yusen Qiao<sup>a,b</sup> and Huabing Yin<sup>\*a,b</sup>

<sup>a</sup> *Joint Center for Theoretical Physics, Institute for Computational Materials Science, School of Physics and Electronics, Henan University, Kaifeng 475004, China.*

<sup>b</sup> *International Joint Research Laboratory of New Energy Materials and Devices of Henan Province, School of Physics and Electronics, Henan University, Kaifeng 475004, China.*

\*Authors to whom correspondence should be addressed: [yhb@henu.edu.cn](mailto:yhb@henu.edu.cn)

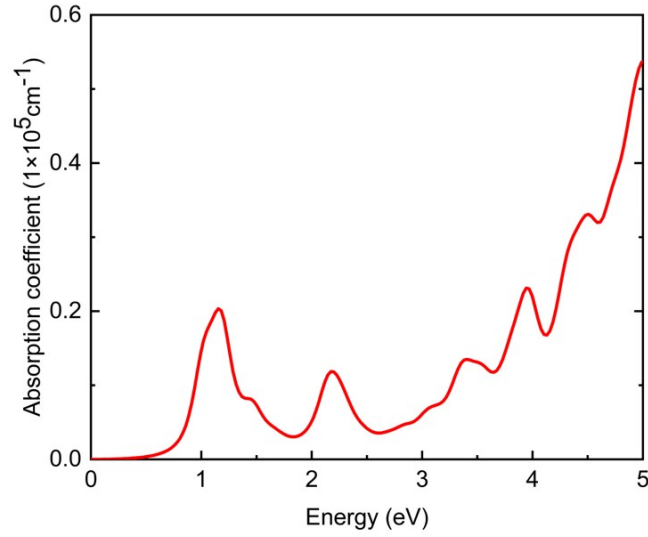

**Fig. S1.** (a) Calculated absorption spectrum of 1D single-chain  $W_6PCl_{17}$  at the HSE06 level with the polarization direction along the chain direction.

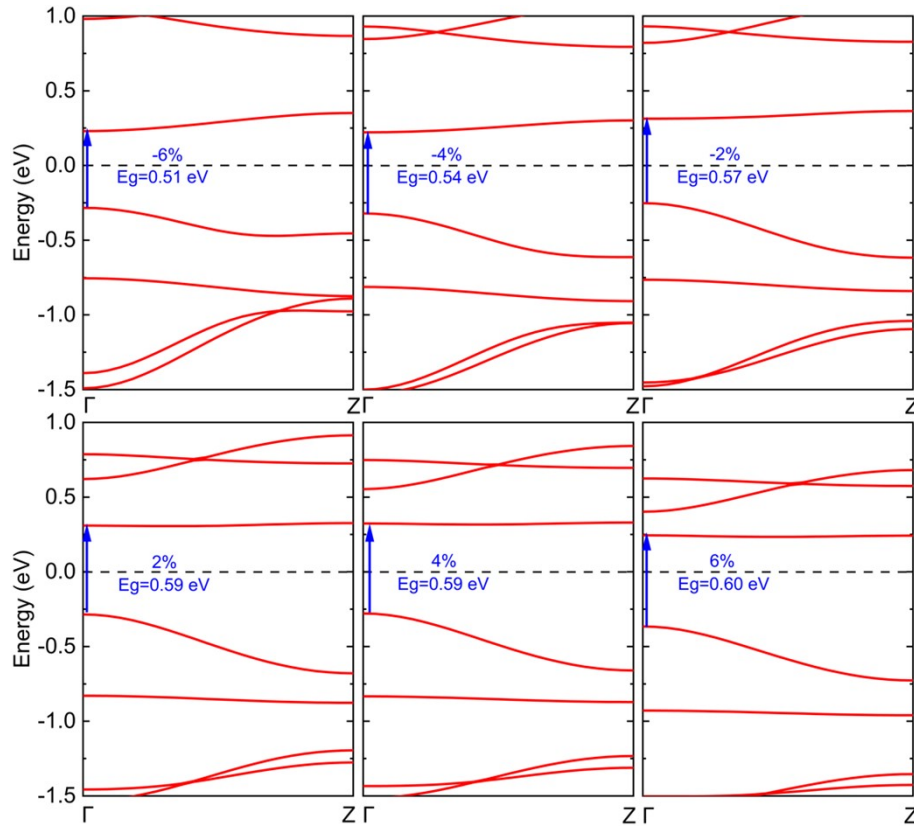

**Fig. S2.** (a) Electronic band structures of 1D single-chain  $W_6PCl_{17}$  under the strains varying from -6% to 6% along the z directions. The band gaps are highlighted in blue. The Fermi level is set at zero.

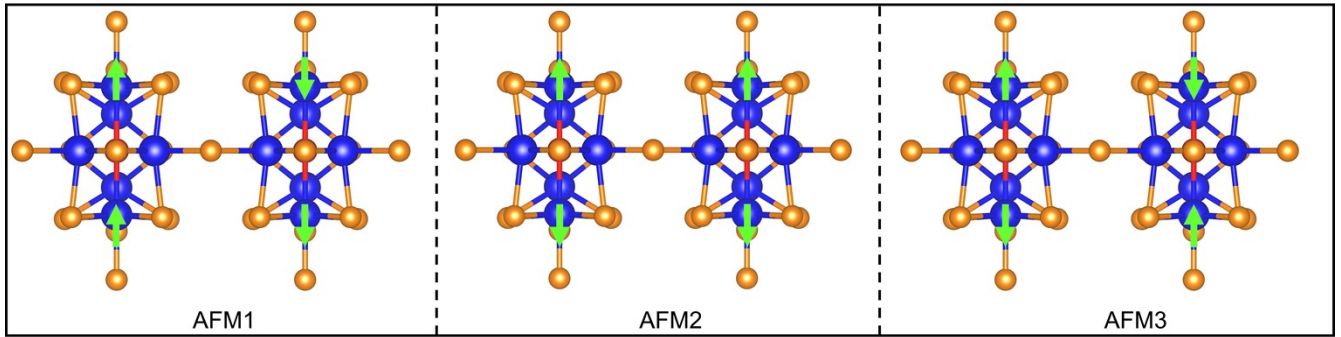

**Fig. S3.** Possible doping AFM configurations of 1D single-chain  $W_6PCl_{17}$ : AFM1, AFM2, and AFM3.

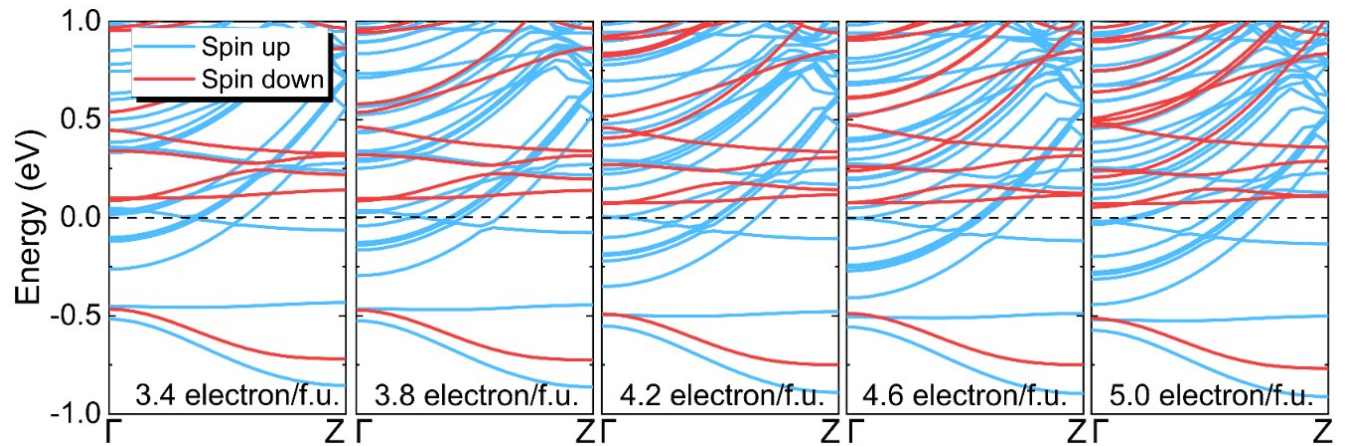

**Fig. S4.** The spin-polarized band structures of single-chain  $W_6PCl_{17}$  calculated with the PBE functional at different electron concentrations  $n$ : 3.4, 3.8, 4.2, 4.6, and 5.0 electron/f.u., which correspond to  $5.17 \times 10^{14}/\text{cm}^2$ ,  $5.78 \times 10^{14}/\text{cm}^2$ ,  $6.38 \times 10^{14}/\text{cm}^2$ ,  $6.99 \times 10^{14}/\text{cm}^2$ , and  $7.60 \times 10^{14}/\text{cm}^2$ , respectively. The blue and red solid lines denote the spin-up and spin-down components, respectively.

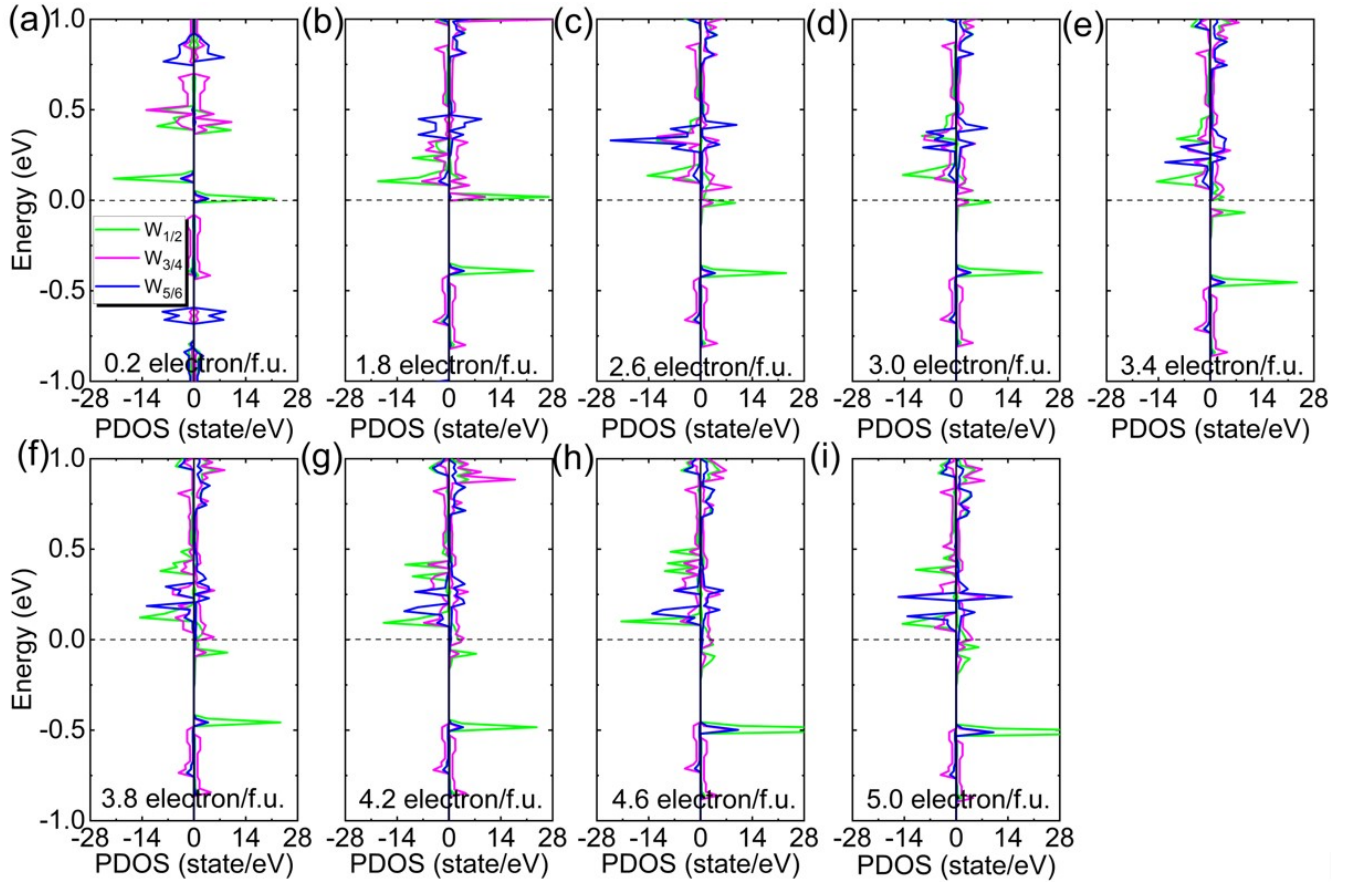

**Fig. S5.** The PDOS of single-chain  $W_6PCl_{17}$  projected onto  $d$  orbitals of six W atoms in the primitive cell at different electron concentrations: 0.2, 1.8, 2.6, 3.0, 3.4, 3.8, 4.2, 4.6, and 5.0 electron/f.u., which correspond to  $0.3 \times 10^{14}/\text{cm}^2$ ,  $2.74 \times 10^{14}/\text{cm}^2$ ,  $3.95 \times 10^{14}/\text{cm}^2$ ,  $4.56 \times 10^{14}/\text{cm}^2$ ,  $5.17 \times 10^{14}/\text{cm}^2$ ,  $5.78 \times 10^{14}/\text{cm}^2$ ,  $6.38 \times 10^{14}/\text{cm}^2$ ,  $6.99 \times 10^{14}/\text{cm}^2$ , and  $7.60 \times 10^{14}/\text{cm}^2$ , respectively.
